# Supplementary material for: A highly efficient heterostructure nanorod bifunctional electrocatalyst for realizing enhanced overall water splitting at a large current density
Source: Royal Society of Chemistry journal article supplement (doi:10.1039/d3ta03113f), 2023-01-01
Supplement: d3ta03113f1.pdf [file d3ta03113f1.pdf]

Supporting Information

**Highly efficient heterostructure nanorods bifunctional electrocatalyst for realizing enhanced overall water splitting at a large current density**

Derun Li<sup>a</sup>, Shixin Wu<sup>a</sup>, Tao Jiang<sup>a</sup>, Shuangshuang Huang<sup>b</sup>, Zhaowu Wang<sup>c,d,\*</sup>, Hengyi Wu<sup>a</sup>, Guangxu Cai<sup>a</sup>, and Feng Ren<sup>a,b\*</sup>

<sup>a</sup> School of Physics and Technology, Center for Ion Beam Application Center for Electron Microscopy Hubei Key Laboratory of Nuclear Solid Physics and MOE Key Laboratory of Artificial Micro- and Nano-Structures, Wuhan University, Wuhan 430072, China

<sup>b</sup> Center for Electron Microscopy, and MOE Key Laboratory of Artificial Micro- and Nano-Structures, Wuhan University, Wuhan 430072, China

<sup>c</sup> School of Science, Hebei University of Technology, Tianjin 300401

<sup>d</sup> School of Physics and Engineering, Longmen Laboratory, Henan University of Science and Technology, Luoyang 471023, China

\* Corresponding authors.

E-mail: [fren@whu.edu.cn](mailto:fren@whu.edu.cn) (F. Ren), E-mail: [wangzhaowu@haust.edu.cn](mailto:wangzhaowu@haust.edu.cn) (Z. Wang)

## ***Experimental Procedures***

### ***Chemicals***

NiFe foam (labeled as NFF) and Ni foam (labeled as NF) with 1.5 mm thickness were purchased from Suzhou Longshengbao Co., Ltd. (SLC, China). Potassium hydroxide (KOH), ammonium fluoride (NH<sub>4</sub>F), and sodium sulfide (Na<sub>2</sub>S) were purchased from Shanghai Meryer Chemical Technology Co. Ltd. (SMCTC, China). Hydrochloric acid, ethanol, and acetone were purchased from Beijing Chemical Factory. Highly purified water (resistance of 18.2 MΩ cm at 25 °C) was used for all experiments. All reagents were of analytical grade and used without further purification if not mentioned.

### ***Materials preparation***

#### ***Synthesize FeS<sub>2</sub>/Fe-Ni<sub>3</sub>S<sub>2</sub>***

The NFF (1.0 cm × 4.0 cm) was cleaned with deionized (DI) water, ethanol, acetone, and 3.0 M HCl by ultrasonic cleaning for 10 min, respectively. Then washed with deionized (DI) water by several times and dried in a vacuum oven. 0.1 M of Na<sub>2</sub>S and 0.48 M of NH<sub>4</sub>F (F48) were dissolved in 60 ml of deionized water and stirred for 10 minutes to get a clear solution. Then the mixture solution was transferred into a Teflon-lined autoclave with a volume of 100 mL, and a cleaned NFF was immersed in the above solution. The sealed autoclave was heated at 150°C for 6 h to get FeS<sub>2</sub>/Fe-Ni<sub>3</sub>S<sub>2</sub>. For comparison, the experiments with different ammonium fluoride concentrations (0, 0.06, 0.12, 0.24, 0.36, and 0.6 M, denoted as F0, F6, F12, F24, F36, and F60) were carried out simultaneously.

#### ***Synthesize Ni<sub>3</sub>S<sub>2</sub> and FeS<sub>2</sub>***

Ni<sub>3</sub>S<sub>2</sub> electrodes were prepared through a similar process by using NF as the substrate. FeS<sub>2</sub> electrodes were obtained according to the reported method.<sup>1</sup>

#### ***Synthesis of IrO<sub>2</sub> and Pt/C on NFF***

5 mg of Pt/C was mixed with 450 μL of deionized water, 450 μL of absolute ethanol, and 20 μL of Nafion (5 wt%), and the resulting mixture was sonicated for 60 min to obtain Pt/C ink. IrO<sub>2</sub> ink was prepared using the same method. Then use a pipette to draw 2 μL ink each time, which was carefully dropped onto the NFF and then dried naturally at room temperature. The total ink added was 38 μL, which was dropped in 19 times for the coating. Using this method, Pt/C electrodes and IrO<sub>2</sub> electrodes were prepared separately.

### ***Characterization***

The X-ray diffraction (XRD) patterns were obtained from a Smart Lab 3KW with Cu Kα irradiation. The morphology of the samples was characterized by a field-emission scanning electron microscope (FE-SEM; Hitachi S-4800). Transmission electron microscope (TEM) and high-resolution transmission

electron microscope (HRTEM) images were characterized by JEM-F200 at 200 kV. The X-ray photoelectron spectroscopy (XPS) was performed on a Thermo Scientific ESCALAB 250Xi system.

### ***Electrochemical Measurements.***

All electrochemical measurements were performed on an electrochemical workstation (CHI 760E, CH Instruments Inc., Shanghai) in a typical three-electrode system. Thereinto, Hg/HgO was used as the reference electrode and a carbon rod as the counter electrode. OER performances were measured by performing linear sweep voltammetry (LSV, scan rate of 2 mV s<sup>-1</sup>) in O<sub>2</sub> saturated 1.0 M KOH (PH = ~14) solution and HER performances were in N<sub>2</sub> saturated 1.0 M KOH, and all initial data were corrected against ohmic potential drop with 90% iR compensation unless otherwise noted. All the potentials reported for HER and OER was converted to the potential versus the reversible hydrogen electrode (RHE) according to the equation: E vs RHE = E vs Hg/HgO + E° Hg/HgO + 0.059pH. The effective geometric area of the electrodes remained 1 cm<sup>2</sup> and directly used as the work electrode for electrochemical characterizations. Before the LSV measurement, a number of cyclic voltammetry (CV) measures were performed at a scan of 50 mV s<sup>-1</sup> until the signals were stabilized to obtain the polarization curves. Electrochemical impedance spectroscopy (EIS) test was carried out in the range from 100 000 Hz to 0.1 Hz with 10 mV alternate current (AC) amplitude. Cyclic voltammogram (CV) measures on the different electrodes with different scan rates (50, 60, 70, 80, 90 and 100 mV s<sup>-1</sup>) from 0.45 to 0.55 V vs. RHE to calculate effective electrochemical active surface area (ECSA). The long-time stability was quantified by recording a chronopotentiometry technique for three-electrode and two electrode system. The Chronopotentiometry measurement was performed to evaluate their durability at 1000 mA cm<sup>-2</sup> for several days. In order to maintain the pH and liquid level of the electrolyte in the CP test, a microinjector was introduced to continuously replenish deionized water.

STH Efficiency Calculation. For the photovoltaic–electrocatalysis (PV-EC) system that produces hydrogen and oxygen molecules using only solar power as the input, the solar-to-hydrogen efficiency (STH) is defined as:

$$STH = \frac{1.23V \times j_{sc} \times \eta}{P \times A}$$

Where the  $j_{sc}$  represents the operating current density of the PV-EC system, 1.23 V is corresponded to the change of Gibbs free energy of overall water splitting.  $\eta$  is the Faradaic efficiency, which is assumed to be 100%. A is the effective illuminated area (1 cm<sup>2</sup>), P is the power of solar illumination.

### ***DFT calculations***

All density functional theory (DFT) calculations were carried out by Vienna ab-Initio Simulation Package (VASP).<sup>2</sup> Core electrons are described by pseudopotentials generated from the projector augmented wave method,<sup>3</sup> and valence electrons are expanded in a plane-wave basis set with an energy cutoff of 460 eV. The Perdew-Burke- Ernzerh (PBE) exchange correlation functional was used. The

surfaces are simulated by slab model with a vacuum layer of 18 Å, which is sufficiently large to exclude the influence of models in vertical direction.

For the hydrogen evolution reaction, the adsorption energy of intermediate hydrogen ( $\Delta G_{H^*}$ ) is the key indicator to evaluate HER catalytic activity which is calculated by following Equation:

$$\Delta G_{H^*} = \Delta E_H + \Delta E_{ZPE} - T\Delta S_H$$

where  $\Delta E_H$ ,  $\Delta E_{ZPE}$  and  $T\Delta S_H$  are described the binding energy, zero-point energy change and entropy difference of hydrogen adsorption, respectively. and  $\Delta E_H$  is calculated by following Equation:

$$\Delta E_H = E_{\text{surf}+H} - E_{\text{surf}} - 1/2E_{H_2}$$

where the  $E_{\text{surf}+H}$  is the total energy of absorbed system, the  $E_{\text{surf}}$  and  $E_{H_2}$  are the energies of bare surface and gas phase species, respectively.

For oxygen evolution reaction in alkaline condition, the following  $4e^-$  mechanism was adopted:

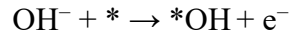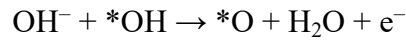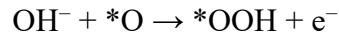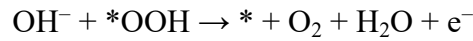

The “\*” represents the active site when OER occurs. The “\*OH”, “\*O”, and “\*OOH” represented the intermediate species adsorbed on the active sites. The Gibbs free energy of the adsorbed intermediates is calculated by the equation:

$$\Delta G = \Delta E + \Delta E_{ZPE} - T\Delta S.$$

## Results and Discussion

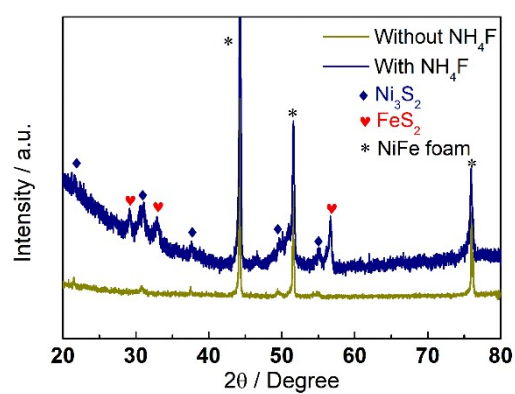

Figure S1. The XRD patterns of samples without and with  $\text{NH}_4\text{F}$  (0.48 M).

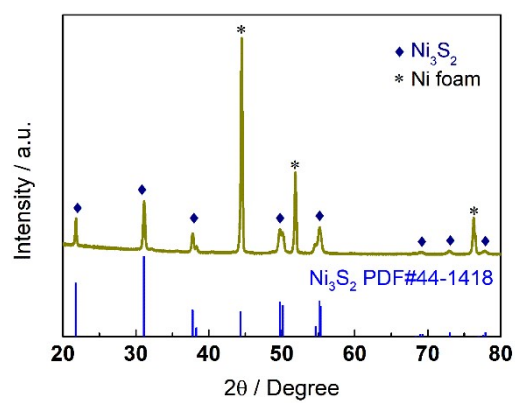

Figure S2. The XRD pattern of  $\text{Ni}_3\text{S}_2$ .

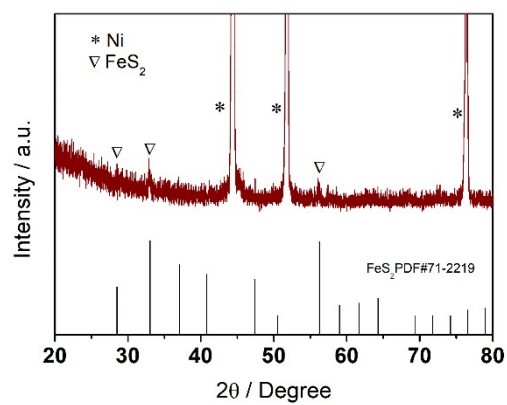

Figure S3. The XRD pattern of FeS<sub>2</sub>/NF.

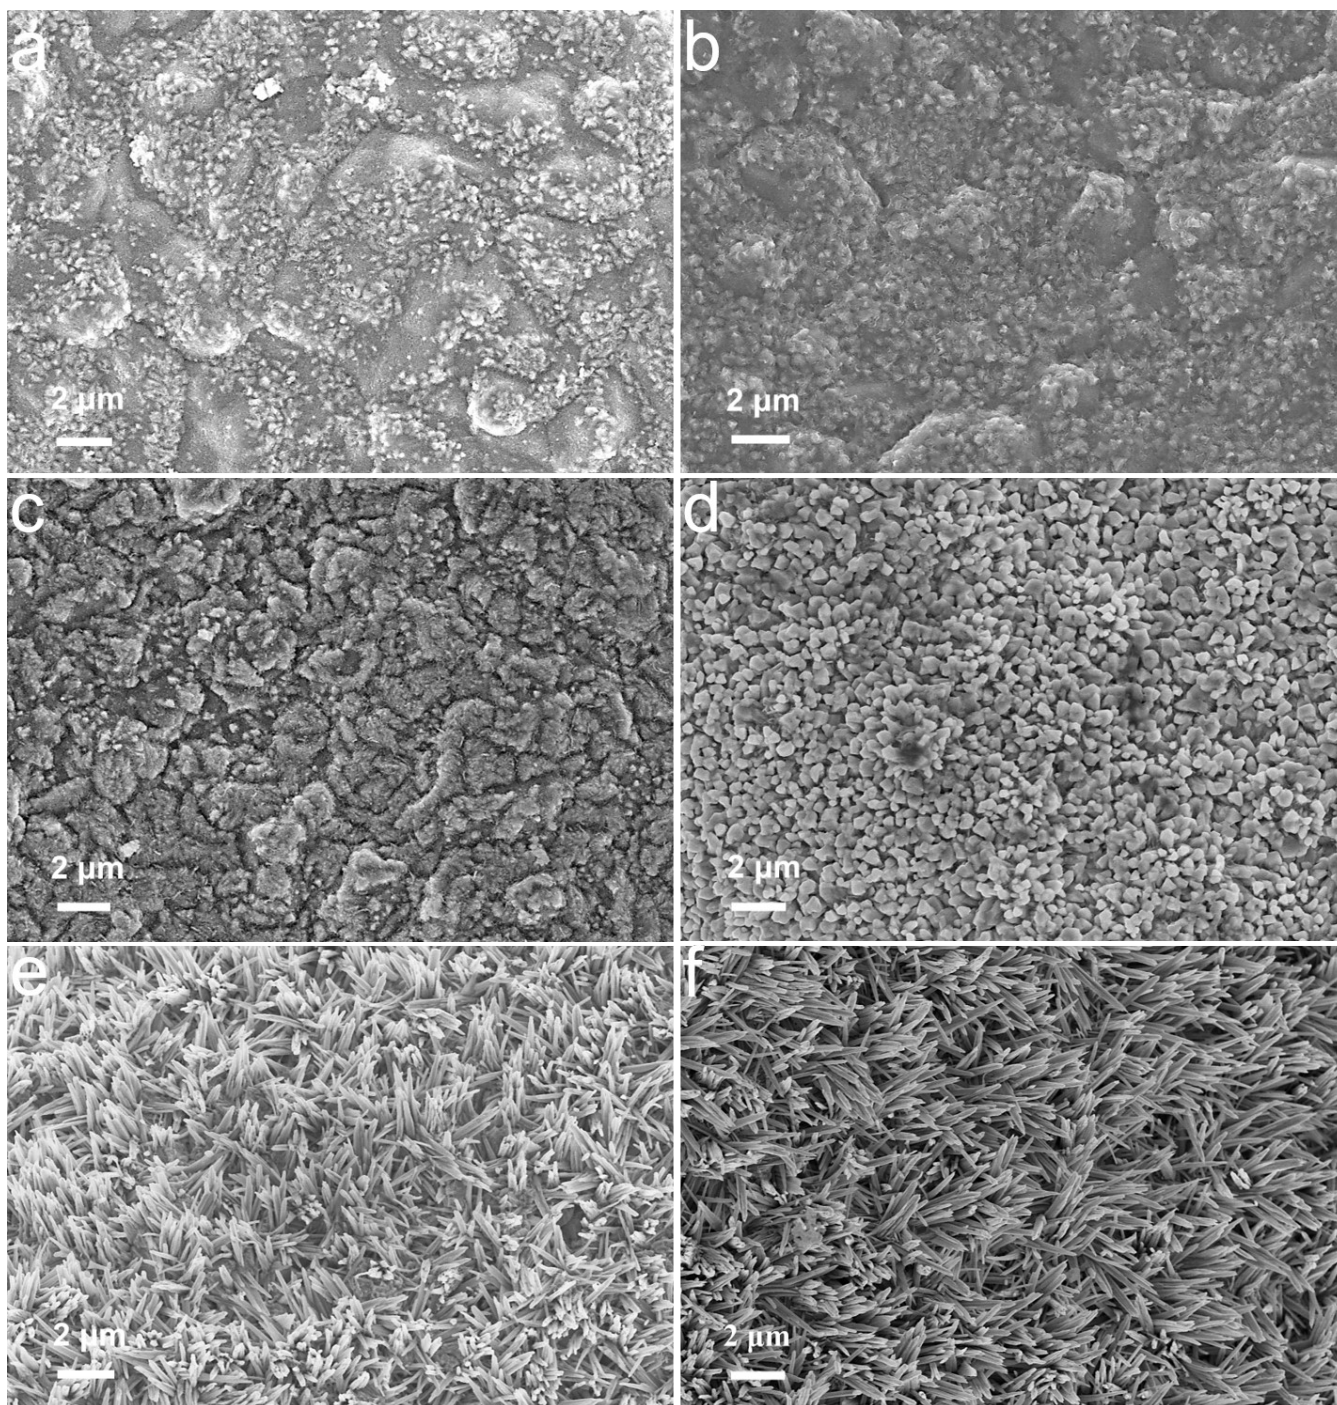

Figure S4. (a-c) The SEM images of  $\text{Ni}_3\text{S}_2$  (F0, F6, F12) and (d-f)  $\text{FeS}_2/\text{Fe-Ni}_3\text{S}_2$  (F24, F36, F60).

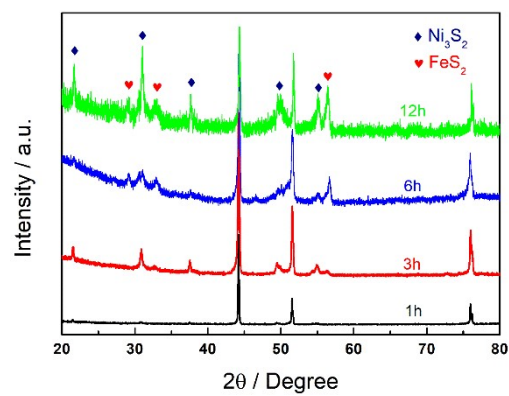

Figure S5. The XRD patterns of FeS<sub>2</sub>/Fe-Ni<sub>3</sub>S<sub>2</sub> for different preparation times (1 h, 3 h, 6 h, and 12 h).

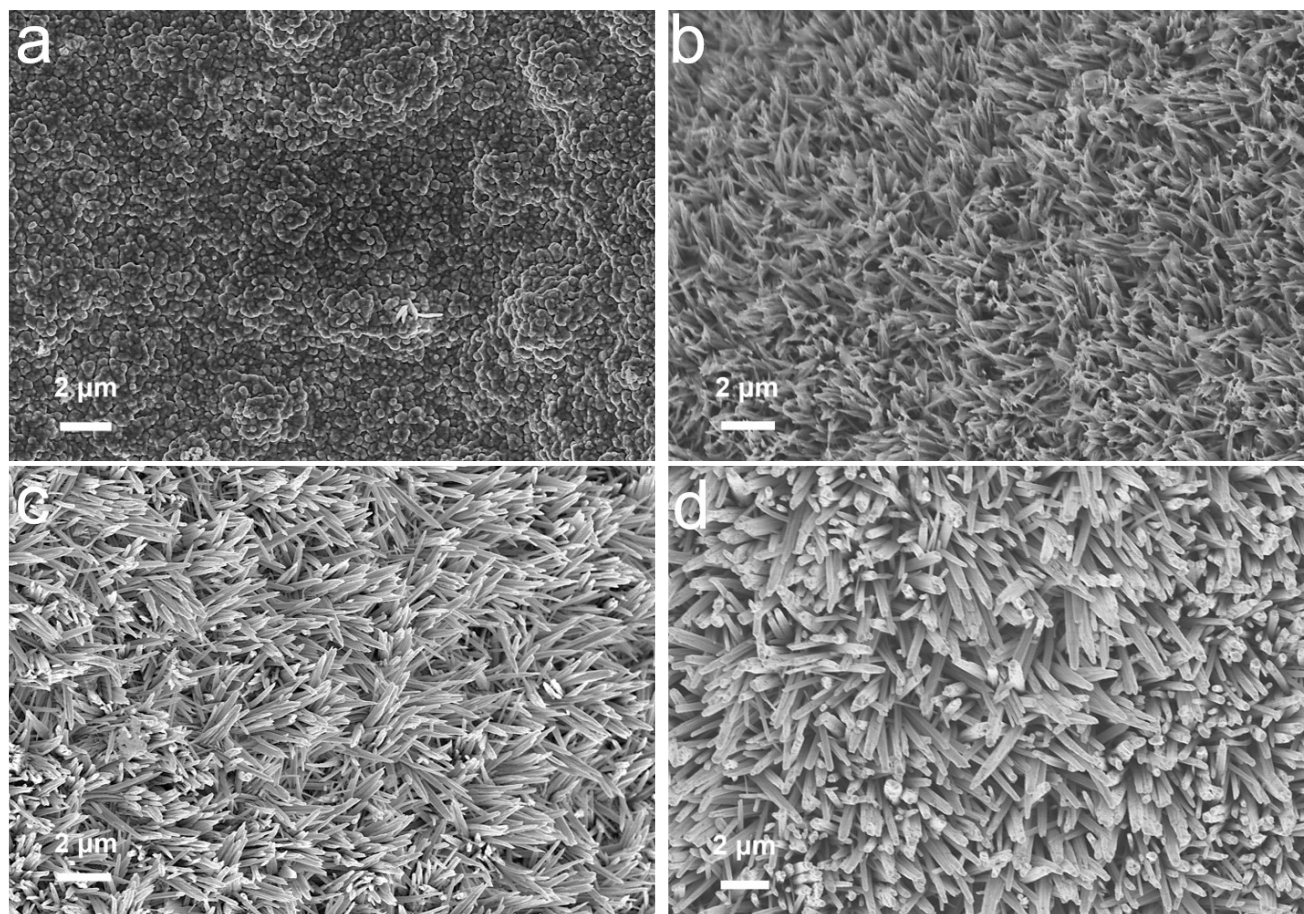

Figure S6. The SEM images of FeS<sub>2</sub>/Fe-Ni<sub>3</sub>S<sub>2</sub> for different preparation times. (a) 1 h, (b) 3 h, (c) 6 h, and (d) 12 h.

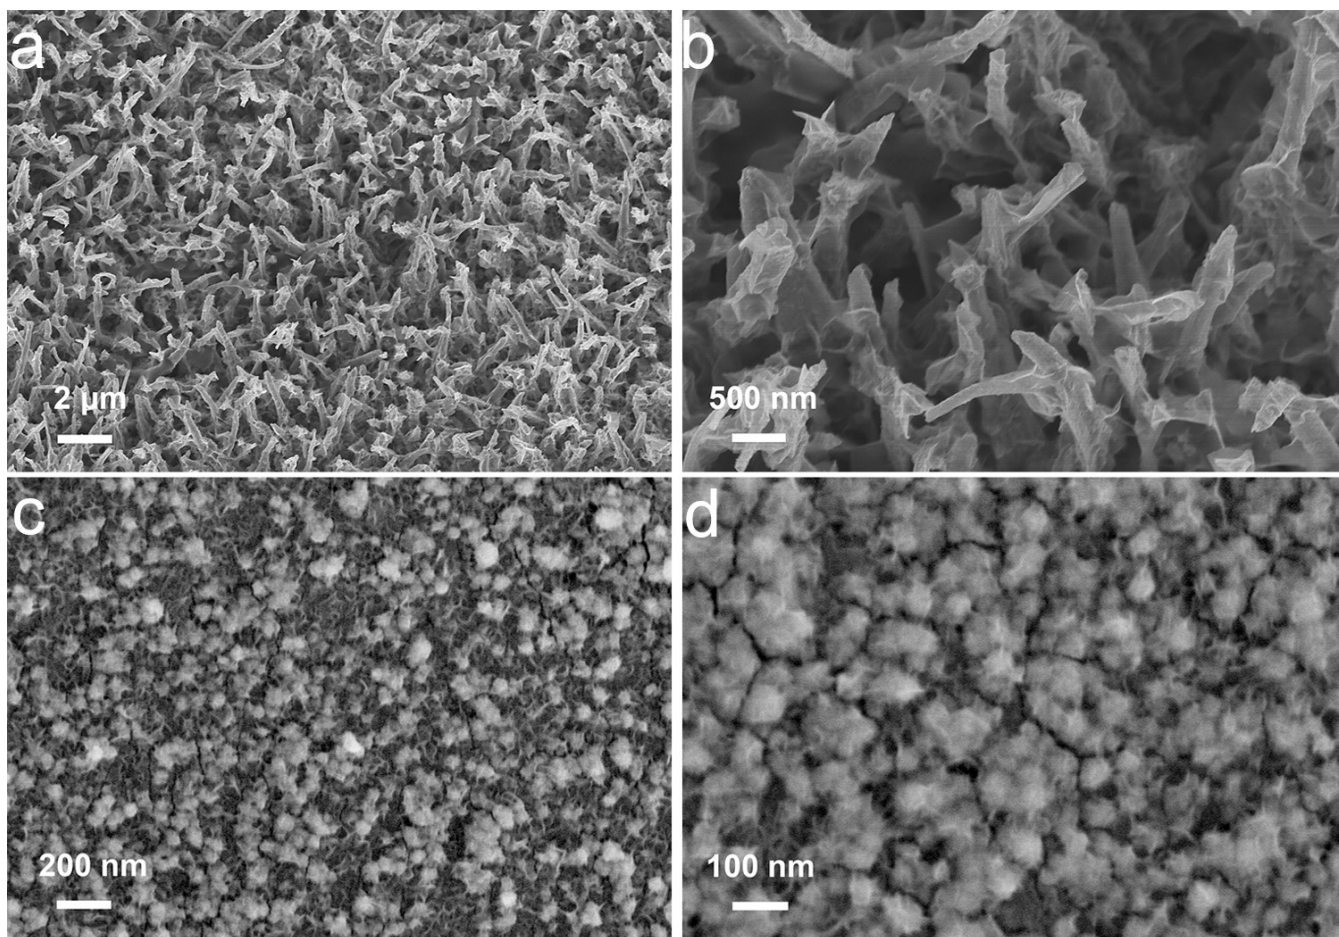

Figure S7. The SEM images of (a, b)  $\text{Ni}_3\text{S}_2$  and (c, d)  $\text{FeS}_2$

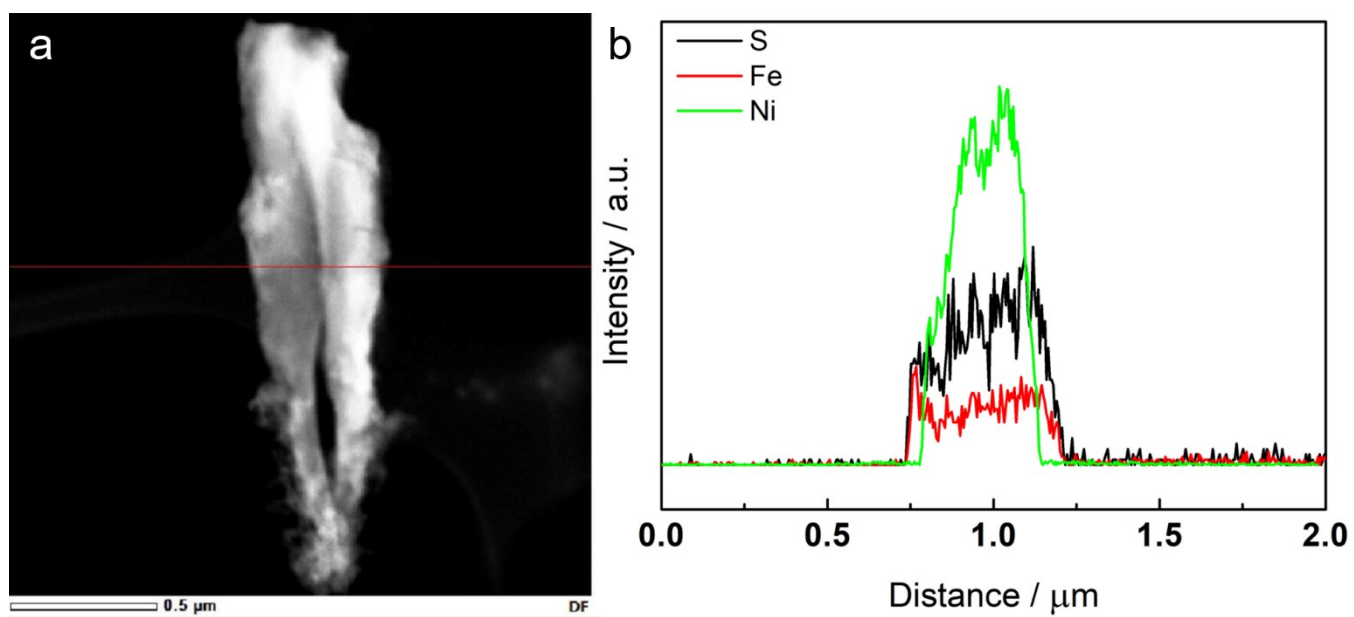

Figure S8. The TEM EDS line-scans of  $\text{FeS}_2/\text{Fe-Ni}_3\text{S}_2$ .

| Catalyst                                                             | Electrolyte solution | Current density (j)                               | Overpotential    | Stability test                   | Reference |
|----------------------------------------------------------------------|----------------------|---------------------------------------------------|------------------|----------------------------------|-----------|
| FeS <sub>2</sub> /Fe-Ni <sub>3</sub> S <sub>2</sub>                  | 1 M KOH              | 10 mA cm <sup>-2</sup><br>100 mA cm <sup>-2</sup> | 180 mV<br>223 mV | 1000 h at 1 A cm <sup>-2</sup>   | This work |
| FeS <sub>2</sub> /NiS <sub>2</sub> HDSNRs                            | 1 M KOH              | 50 mA cm <sup>-2</sup>                            | 280 mV           | 40 h at 100 mA cm <sup>-2</sup>  | 4         |
| FeS/Ni <sub>3</sub> S <sub>2</sub> @NF                               | 1 M KOH              | 10 mA cm <sup>-2</sup>                            | 192 mV           | /                                | 5         |
| IrSA/NFS                                                             | 1 M KOH              | 10 mA cm <sup>-2</sup>                            | 230mV            | 350 h at 175 mA cm <sup>-2</sup> | 6         |
| Ni <sub>3</sub> S <sub>2</sub> -NGQDs/NF                             | 1 M KOH              | 10 mA cm <sup>-2</sup>                            | 218 mV           | 17 h at 10 mA cm <sup>-2</sup>   | 7         |
| a-Mo-Ni <sub>3</sub> S <sub>2</sub>                                  | 1 M KOH              | 100 mA cm <sup>-2</sup>                           | 276 mV           | /                                | 8         |
| Ni-Fe disulfide @oxyhydroxide                                        | 1 M KOH              | 10 mA cm <sup>-2</sup>                            | ~230 mV          | 50 h at 10 mA cm <sup>-2</sup>   | 9         |
| Fe <sub>11.1</sub> %-Ni <sub>3</sub> S <sub>2</sub> /Ni              | 1 M KOH              | 100 mA cm <sup>-2</sup>                           | 252 mV           | /                                | 10        |
| Ni <sub>3</sub> S <sub>2</sub> -Co <sub>9</sub> S <sub>8</sub> /NF   | 1 M KOH              | 100 mA cm <sup>-2</sup>                           | 350 mV           | 20 h at 100 mA cm <sup>-2</sup>  | 11        |
| Ni <sub>3</sub> S <sub>2</sub> @FeNi <sub>2</sub> S <sub>4</sub> @NF | 1 M KOH              | 20 mA cm <sup>-2</sup>                            | 255 mV           | 24 h at 90 mA cm <sup>-2</sup>   | 12        |
| Ni <sub>3</sub> S <sub>4</sub> /NiS <sub>2</sub> /FeS <sub>2</sub>   | 1 M KOH              | 10 mA cm <sup>-2</sup>                            | 230 mV           | 8 h at 10 mA cm <sup>-2</sup>    | 13        |
| Fe-Ni <sub>3</sub> S <sub>2</sub> /FeNi                              | 1 M KOH              | 10 mA cm <sup>-2</sup>                            | 282 mV           | 9 h at 100 mA cm <sup>-2</sup>   | 14        |
| Zn-Ni <sub>3</sub> S <sub>2</sub> /NF                                | 1 M KOH              | 100 mA cm <sup>-2</sup>                           | 330 mV           | 20 h at 50 mA cm <sup>-2</sup>   | 15        |
| Cu@CoS <sub>x</sub> /CF                                              | 1 M KOH              | 100 mA cm <sup>-2</sup>                           | 310 mV           | /                                | 16        |
| NiCo <sub>2</sub> S <sub>4</sub> NW/NF                               | 1 M KOH              | 10 mA cm <sup>-2</sup>                            | 260 mV           | 50 h at 10 mA cm <sup>-2</sup>   | 17        |
| Au/Ni <sub>3</sub> S <sub>2</sub> /NF                                | 1 M KOH              | 10 mA cm <sup>-2</sup>                            | 230 mV           | 60 h at 10 mA cm <sup>-2</sup>   | 18        |
| NiS/NF                                                               | 1 M KOH              | 50 mA cm <sup>-2</sup>                            | 335 mV           | 20 h at 20 mA cm <sup>-2</sup>   | 19        |
| N-Ni <sub>3</sub> S <sub>2</sub> /NF                                 | 1 M KOH              | 10 mA cm <sup>-2</sup>                            | 330 mV           | ~3h at 50 mA cm <sup>-2</sup>    | 20        |
| Ni <sub>3</sub> S <sub>2</sub> /Fe-NiP <sub>x</sub> /NF              | 1 M KOH              | 100 mA cm <sup>-2</sup>                           | 240 mV           | 200 h at 30 mA cm <sup>-2</sup>  | 21        |
| Ni-Ni <sub>3</sub> C/CC                                              | 1 M KOH              | 10 mA cm <sup>-2</sup>                            | 268 mV           | 15 h at 20 mA cm <sup>-2</sup>   | 22        |
| Fe <sub>0.9</sub> Ni <sub>2.1</sub> S <sub>2</sub> @NF               | 1 M KOH              | 100 mA cm <sup>-2</sup>                           | 252 mV           | 24 h at 100 mA cm <sup>-2</sup>  | 23        |
| NiFeCoS <sub>x</sub> @FeNi <sub>3</sub>                              | 1 M KOH              | 10 mA cm <sup>-2</sup>                            | 210 mV           | 90 h at 10 mA cm <sup>-2</sup>   | 24        |

Table S1. Comparison of reported various chalcogenides for OER catalyst.

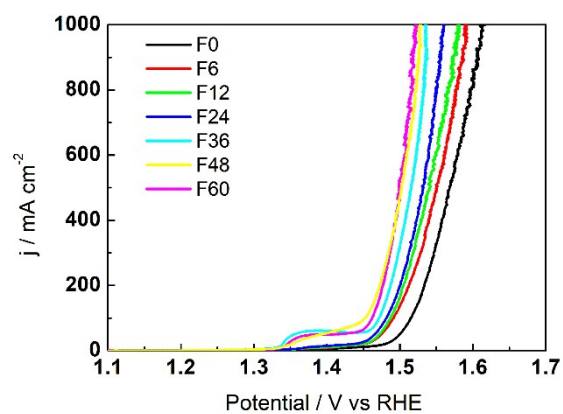

Figure S9. LSV curves of catalyst prepared with different dosages of  $\text{NH}_4\text{F}$ .

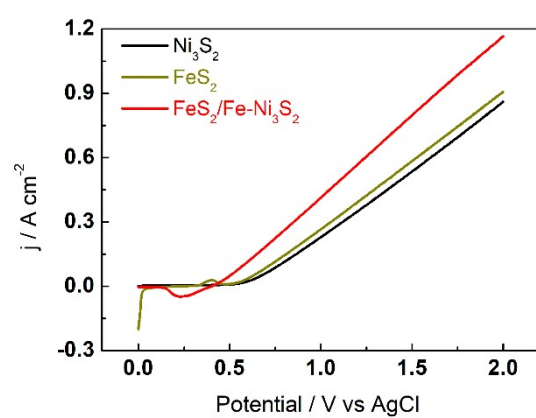

Figure S10. The LSV curves without IR correction.

Table S2. Resistance values of electron components obtained by electronic equivalent circuit simulation for OER.

|                                                     | $R_s$ ( $\Omega$ ) | $R_{ct}$ ( $\Omega$ ) | CPE-T | CPE-P |
|-----------------------------------------------------|--------------------|-----------------------|-------|-------|
| FeS <sub>2</sub> /Fe-Ni <sub>3</sub> S <sub>2</sub> | 1.291              | 0.37                  | 1.225 | 0.612 |
| Ni <sub>3</sub> S <sub>2</sub>                      | 1.017              | 2.08                  | 0.04  | 0.92  |
| FeS <sub>2</sub>                                    | 1.543              | 9.734                 | 0.028 | 0.716 |

$R_s$  is related to the series resistance.  $R_{ct}$  is the charge transfer resistance. CPE is the constant phase angle element, which represents the double-layer capacitance and inductance in the real-world situation.

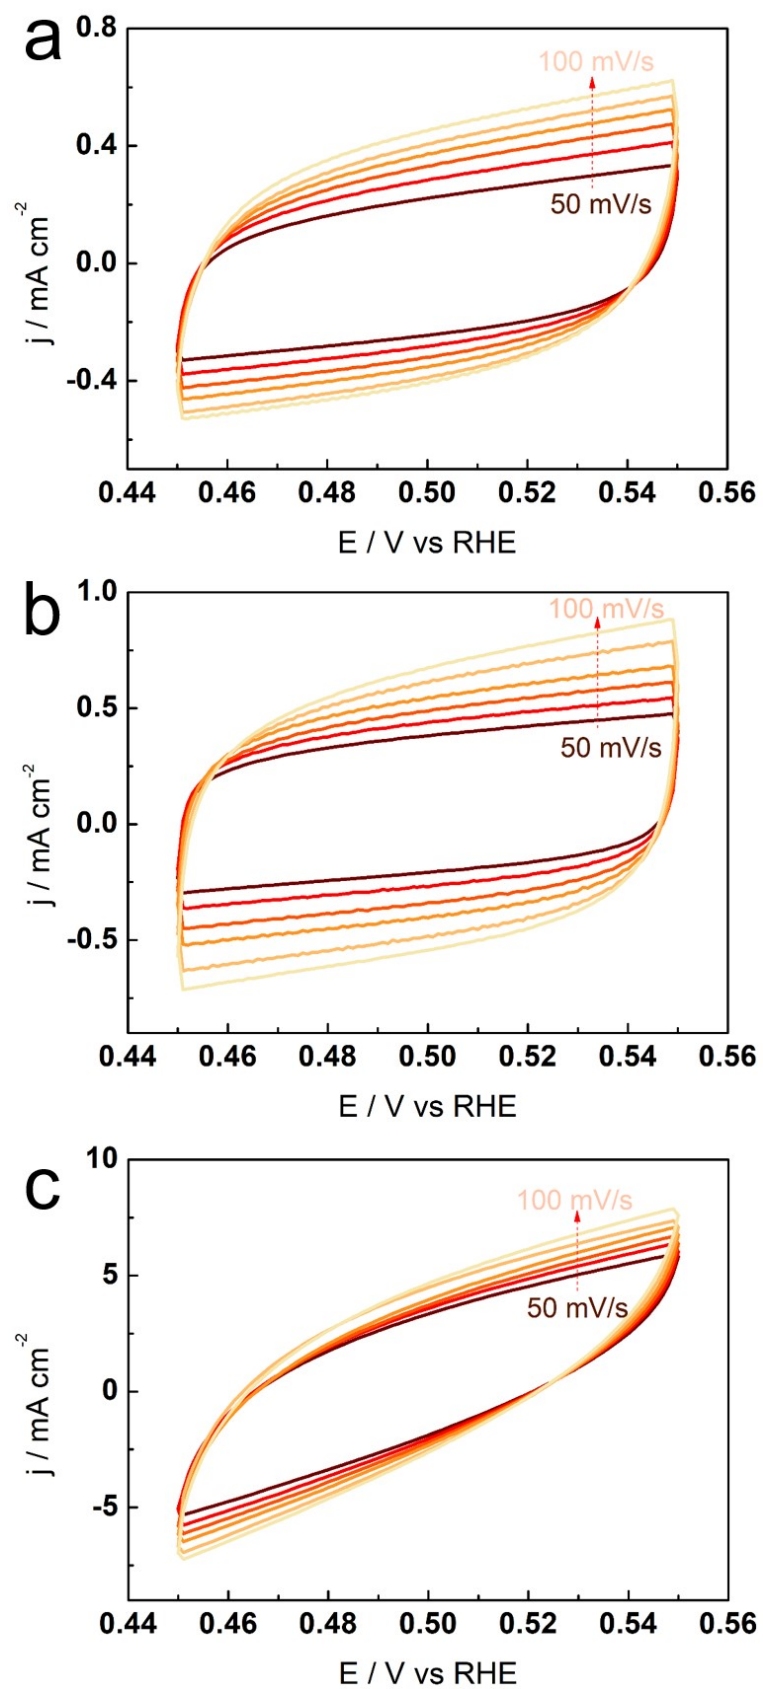

Figure S11. CV curves of (a)  $\text{Ni}_3\text{S}_2$ , (b)  $\text{FeS}_2$ , and (c)  $\text{FeS}_2/\text{Fe-Ni}_3\text{S}_2$ .

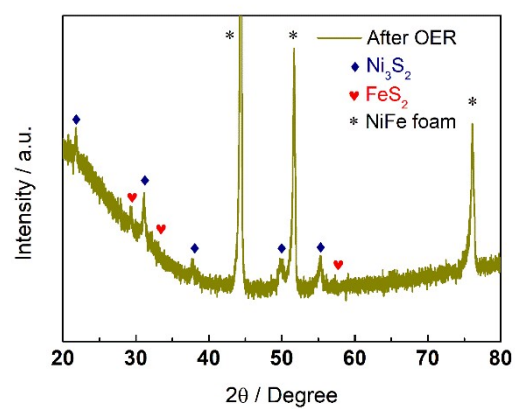

Figure S12. The XRD pattern of  $\text{FeS}_2/\text{Fe-Ni}_3\text{S}_2$  after OER for 500 cycles.

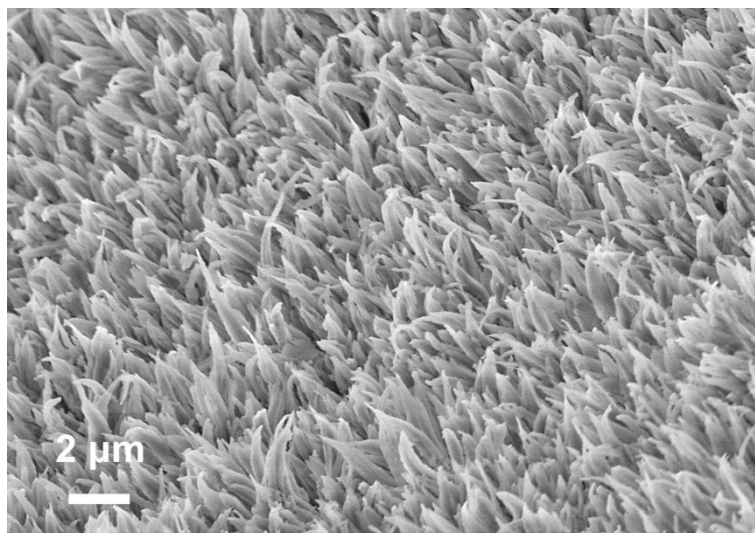

Figure S13. The SEM image of FeS<sub>2</sub>/Fe-Ni<sub>3</sub>S<sub>2</sub> after OER for 500 cycles.

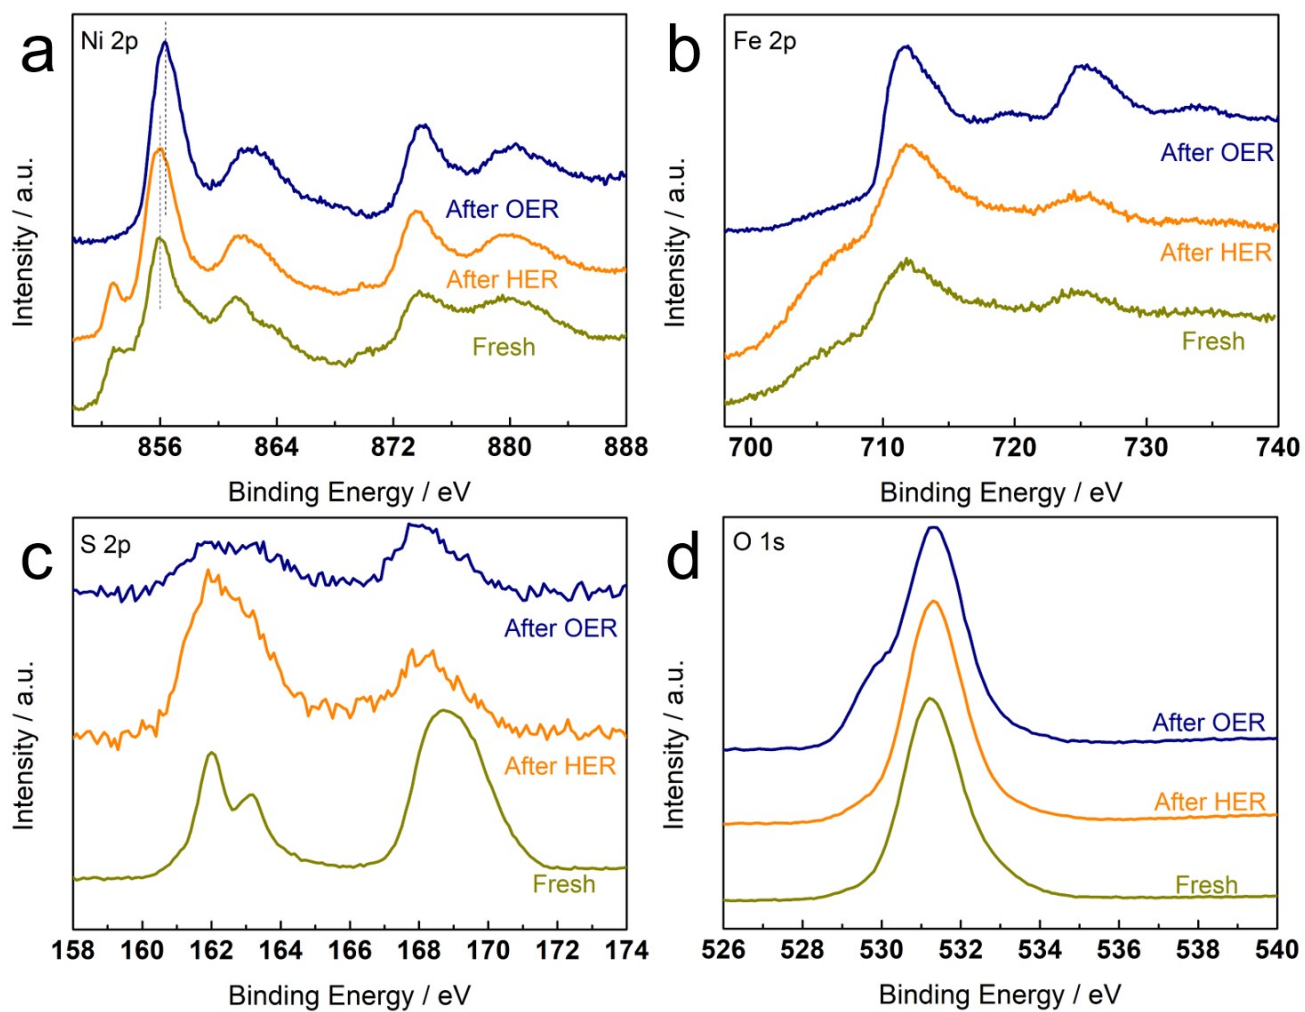

Figure S14. XPS spectrum of FeS<sub>2</sub>/Fe-Ni<sub>3</sub>S<sub>2</sub> after OER and HER for 500 cycles.

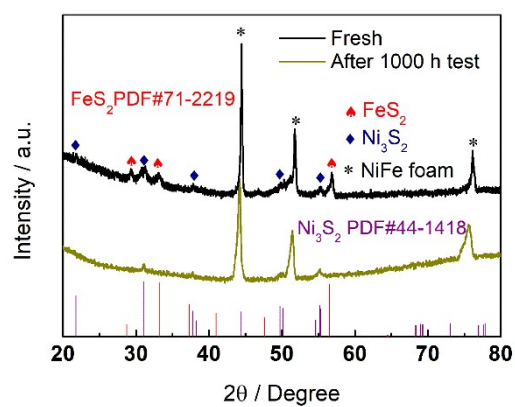

Figure S15. The XRD pattern of FeS<sub>2</sub>/Fe-Ni<sub>3</sub>S<sub>2</sub> after OER stability test at 1 A cm<sup>-2</sup> for 1000 h.

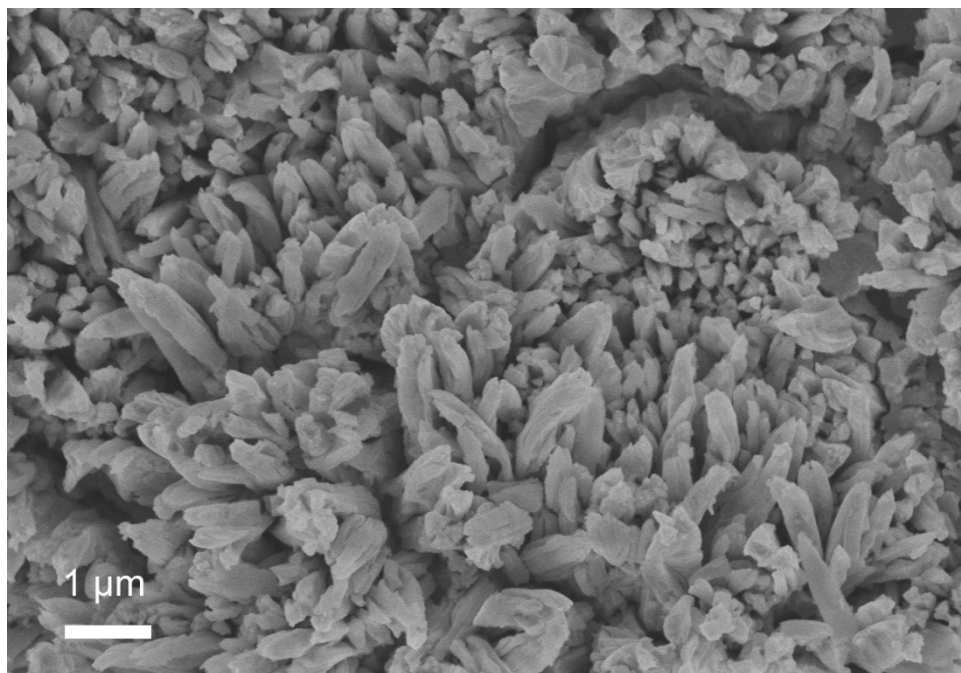

Figure S16. The SEM of FeS<sub>2</sub>/Fe-Ni<sub>3</sub>S<sub>2</sub> after OER stability test at 1 A cm<sup>-2</sup> for 1000 h.

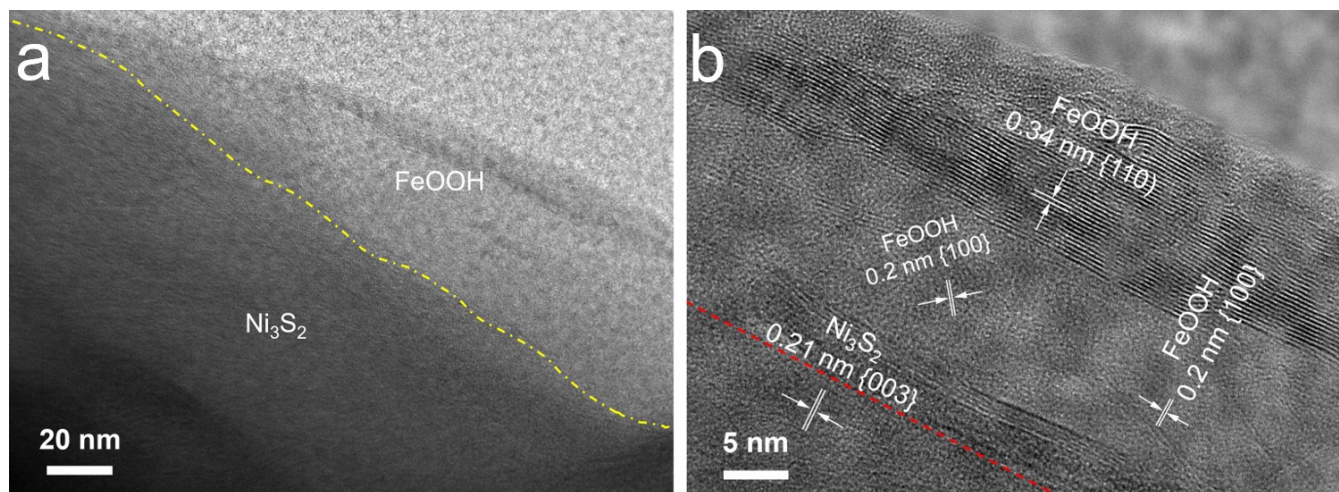

Figure S17. The HRTEM images of FeS<sub>2</sub>/Fe-Ni<sub>3</sub>S<sub>2</sub> after the OER stability test at 1 A cm<sup>-2</sup> for 1000 h.

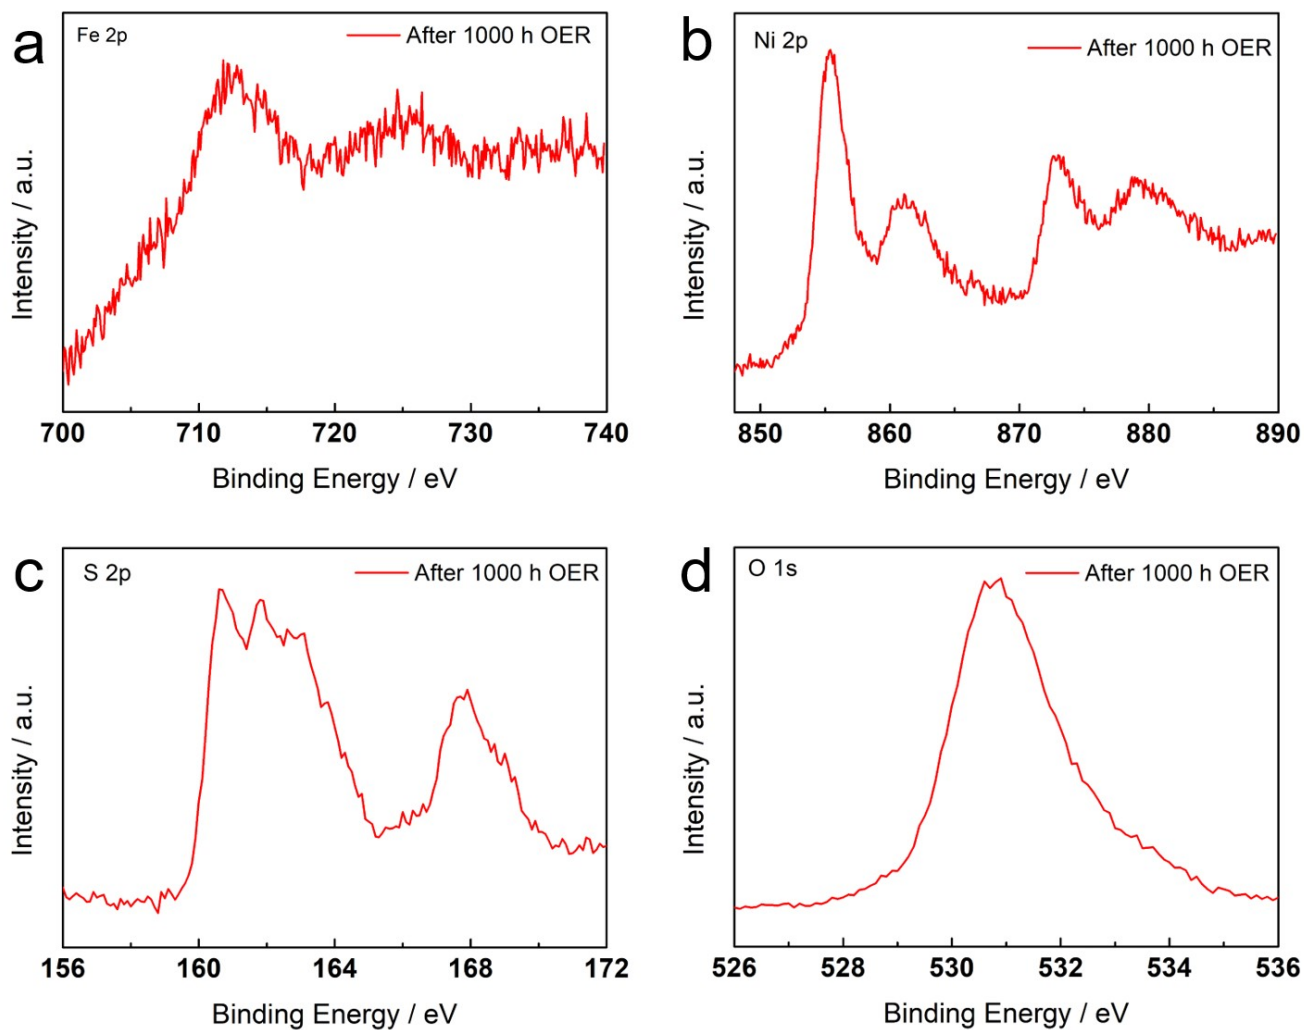

Figure S18. The XPS of FeS<sub>2</sub>/Fe-Ni<sub>3</sub>S<sub>2</sub> after OER stability test at 1 A cm<sup>-2</sup> for 1000 h.

Table S3. Comparison of reported various chalcogenides for HER catalyst.

| Catalyst                                                            | Electrolyte solution | Current density (j)                               | Overpotential    | Reference |
|---------------------------------------------------------------------|----------------------|---------------------------------------------------|------------------|-----------|
| <b>FeS<sub>2</sub>/Fe-Ni<sub>3</sub>S<sub>2</sub></b>               | 1 M KOH              | 10 mA cm <sup>-2</sup><br>100 mA cm <sup>-2</sup> | 105 mV<br>228 mV | This work |
| <b>Ni<sub>3</sub>S<sub>2</sub>/NF</b>                               | 1 M KOH              | 10 mA cm <sup>-2</sup>                            | 186 mV           | 25        |
| <b>NiS/NF</b>                                                       | 1 M KOH              | 20 mA cm <sup>-2</sup>                            | 158 mV           | 19        |
| <b>N-Ni<sub>3</sub>S<sub>2</sub>/NF</b>                             | 1 M KOH              | 10 mA cm <sup>-2</sup>                            | 110 mV           | 20        |
| <b>10% VNS</b>                                                      | 1 M KOH              | 10 mA cm <sup>-2</sup>                            | 110 mV           | 26        |
| <b>Co<sub>3</sub>S<sub>4</sub>@MoS<sub>2</sub></b>                  | 1 M KOH              | 210 mA cm <sup>-2</sup>                           | 210 mV           | 27        |
| <b>Ni<sub>0.7</sub>Fe<sub>0.3</sub>S<sub>2</sub></b>                | 1 M KOH              | 10 mA cm <sup>-2</sup>                            | 155 mV           | 28        |
| <b>Cu NDs/Ni<sub>3</sub>S<sub>2</sub>NTs</b>                        | 1 M KOH              | 100 mA cm <sup>-2</sup>                           | 128 mV           | 29        |
| <b>V-doped Ni<sub>3</sub>S<sub>2</sub></b>                          | 1 M KOH              | 20 mA cm <sup>-2</sup>                            | 232 mV           | 30        |
| <b>NiCo<sub>2</sub>S<sub>4</sub>/Ni<sub>3</sub>S<sub>2</sub></b>    | 1 M KOH              | 10 mA cm <sup>-2</sup>                            | 119 mV           | 31        |
| <b>N-Ni<sub>3</sub>S<sub>2</sub>/NF</b>                             | 1 M KOH              | 10 mA cm <sup>-2</sup>                            | 155 mV           | 32        |
| <b>Ni<sub>3</sub>S<sub>2</sub></b>                                  | 1 M KOH              | 10 mA cm <sup>-2</sup>                            | 335 mV           | 33        |
| <b>Ni<sub>3</sub>S<sub>2</sub>/MnS-O</b>                            | 1 M KOH              | 10 mA cm <sup>-2</sup>                            | 116 mV           | 34        |
| <b>CoNi<sub>2</sub>S<sub>4</sub>/Ni<sub>3</sub>S<sub>2</sub>@NF</b> | 1 M KOH              | 10 mA cm <sup>-2</sup>                            | 171 mV           | 35        |
| <b>δ-FeOOH/Ni<sub>3</sub>S<sub>2</sub>/NF</b>                       | 1 M KOH              | 10 mA cm <sup>-2</sup>                            | 106 mV           | 36        |
| <b>NiWO<sub>4</sub>/Ni<sub>3</sub>S<sub>2</sub></b>                 | 1 M KOH              | 10 mA cm <sup>-2</sup>                            | 136 mV           | 37        |
| <b>Fe-Mo-S/Ni<sub>3</sub>S<sub>2</sub>@NF</b>                       | 1 M KOH              | 10 mA cm <sup>-2</sup>                            | 141 mV           | 38        |
| <b>Ni-FeS<sub>2</sub>-X</b>                                         | 1 M KOH              | 10 mA cm <sup>-2</sup>                            | 258 mV           | 39        |
| <b>MoS<sub>2</sub>/FNS</b>                                          | 1 M KOH              | 10 mA cm <sup>-2</sup>                            | 122 mV           | 40        |
| <b>FeS/Ni<sub>3</sub>S<sub>2</sub>@NF</b>                           | 1 M KOH              | 10 mA cm <sup>-2</sup>                            | 130 mV           | 5         |
| <b>FeS/NiS/NF</b>                                                   | 1 M KOH              | 10 mA cm <sup>-2</sup>                            | 144 mV           | 41        |

Table S4. Resistance values of electron components obtained by electronic equivalent circuit simulation for HER.

|                                         | $R_s$ ( $\Omega$ ) | $R_{ct}$ ( $\Omega$ ) | CPE-T   | CPE-P   |
|-----------------------------------------|--------------------|-----------------------|---------|---------|
| $\text{FeS}_2/\text{Fe-Ni}_3\text{S}_2$ | 1.201              | 0.556                 | 0.35846 | 0.76683 |
| $\text{Ni}_3\text{S}_2$                 | 1.269              | 6.119                 | 0.0635  | 0.86846 |
| $\text{FeS}_2$                          | 2.258              | 30.87                 | 0.025   | 0.65849 |

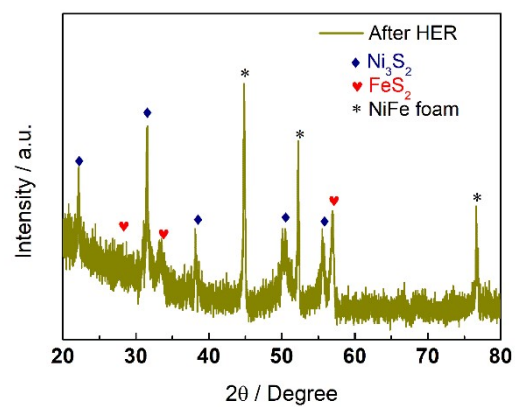

Figure S19. The XRD pattern of  $\text{FeS}_2/\text{Fe-Ni}_3\text{S}_2$  after HER for 500 cycles.

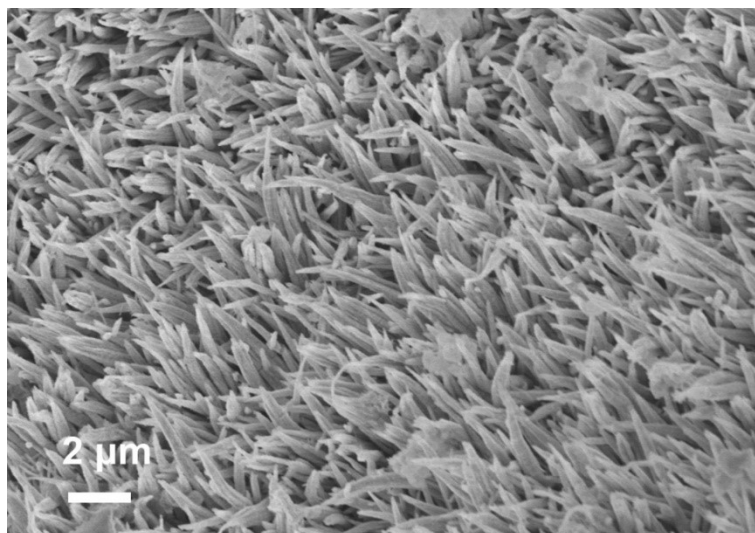

Figure S20. The SEM image of FeS<sub>2</sub>/Fe-Ni<sub>3</sub>S<sub>2</sub> after HER for 500 cycles.

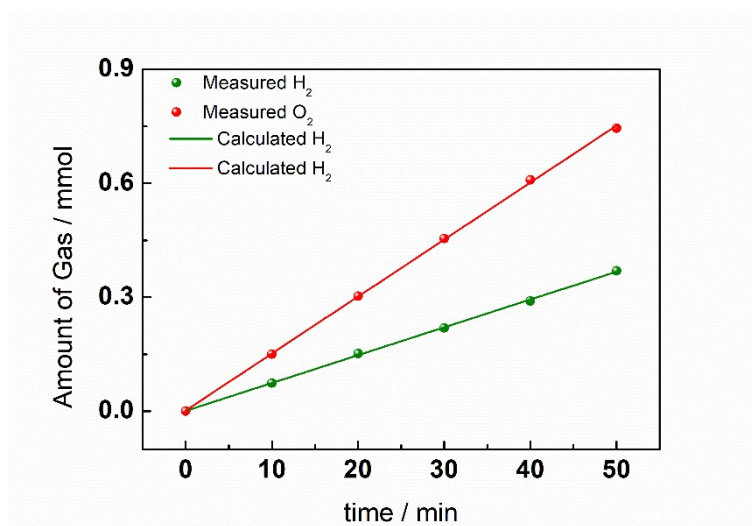

Figure S21. O<sub>2</sub> and H<sub>2</sub> production amount as a function of water splitting time powered by a constant voltage of 1.8 V.

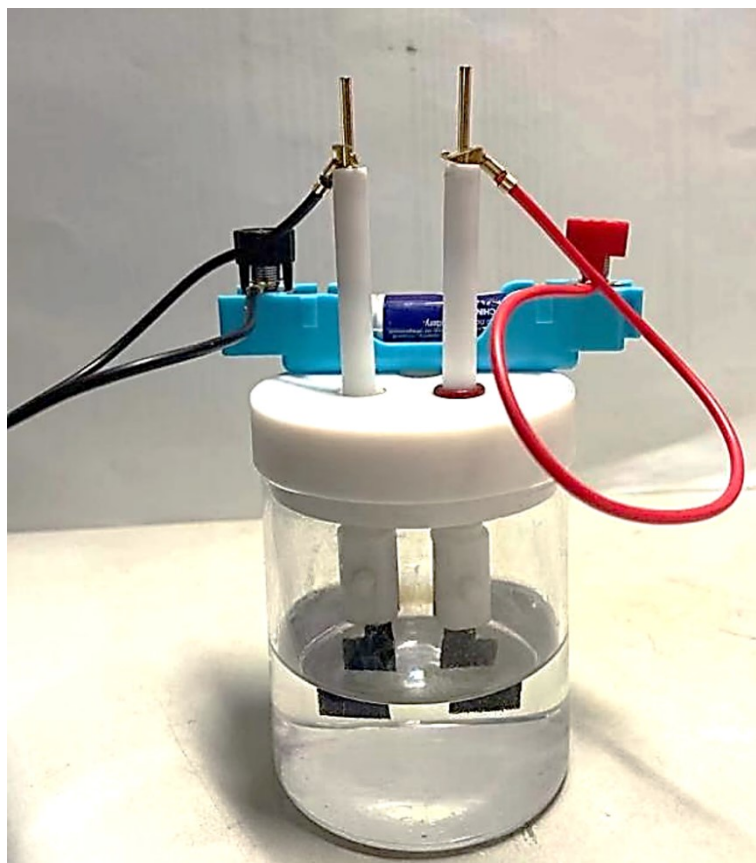

Figure S22. Photograph of water electrolyzer, assembled by  $\text{FeS}_2/\text{Fe-Ni}_3\text{S}_2$  as both anode and cathode, which is powered by a single-cell AA battery of 1.5 V.

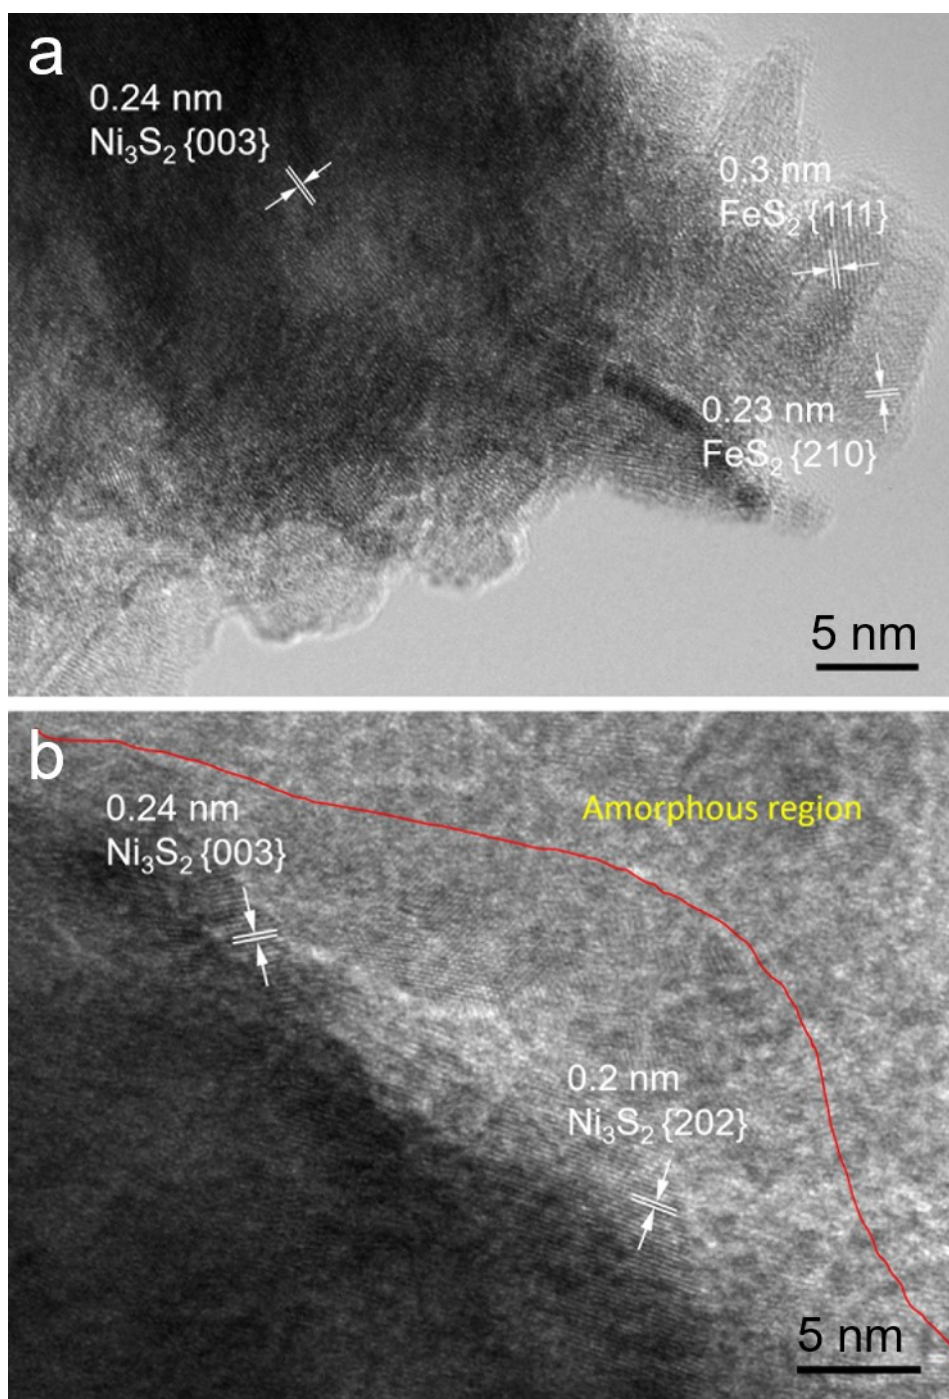

Figure S23. The HRTEM images of a)  $\text{H}_2$  side and b)  $\text{O}_2$  side of water-splitting after 1000 h at  $1\text{ A cm}^{-2}$ .

Table S5 Comparison of reported various chalcogenides for overall water splitting

| Catalyst                                                            | Electrolyte solution | Current density (j)                            | Cell voltage   | Stability test                  | Reference |
|---------------------------------------------------------------------|----------------------|------------------------------------------------|----------------|---------------------------------|-----------|
| <b>FeS<sub>2</sub>/Fe-Ni<sub>3</sub>S<sub>2</sub></b>               | 1 M KOH              | 10 mA cm <sup>-2</sup><br>1 A cm <sup>-2</sup> | 1.5 V<br>1.9 V | 1000 h at 1 A cm <sup>-2</sup>  | This work |
| <b>NiS/NF</b>                                                       | 1 M KOH              | 10 mA cm <sup>-2</sup>                         | 1.64 V         | 34 h at 13 mA cm <sup>-2</sup>  | 19        |
| <b>Ni-Ni<sub>3</sub>C/CC</b>                                        | 1 M KOH              | 10 mA cm <sup>-2</sup>                         | 1.64 V         | 20 h at 20 mA cm <sup>-2</sup>  | 22        |
| <b>Fe<sub>0.9</sub>Ni<sub>2.1</sub>S<sub>2</sub>@NF</b>             | 1 M KOH              | 10 mA cm <sup>-2</sup>                         | 1.51 V         | 100 h at 10 mA cm <sup>-2</sup> | 23        |
| <b>10% VNS</b>                                                      | 1 M KOH              | 10 mA cm <sup>-2</sup>                         | 1.56 V         | 20 h at 10 mA cm <sup>-2</sup>  | 26        |
| <b>Ni<sub>0.7</sub>Fe<sub>0.3</sub>S<sub>2</sub></b>                | 1 M KOH              | 10 mA cm <sup>-2</sup>                         | 1.625 V        | ~14 h at 10 mA cm <sup>-2</sup> | 28        |
| <b>CoNi<sub>2</sub>S<sub>4</sub>/Ni<sub>3</sub>S<sub>2</sub>@NF</b> | 1 M KOH              | 10 mA cm <sup>-2</sup>                         | 1.65 V         | 10 h at 10 mA cm <sup>-2</sup>  | 35        |
| <b>δ-FeOOH/Ni<sub>3</sub>S<sub>2</sub>/NF</b>                       | 1 M KOH              | 10 mA cm <sup>-2</sup>                         | 1.525 V        | 24 h at 20 mA cm <sup>-2</sup>  | 36        |
| <b>Ni-FeS<sub>2</sub>-X</b>                                         | 1 M KOH              | 10 mA cm <sup>-2</sup>                         | 1.55 V         | 22 h at 10 mA cm <sup>-2</sup>  | 39        |
| <b>FeS/Ni<sub>3</sub>S<sub>2</sub>@NF</b>                           | 1 M KOH              | 10 mA cm <sup>-2</sup>                         | 1.51 V         | 50 h at 10 mA cm <sup>-2</sup>  | 5         |
| <b>FeS/NiS/NF</b>                                                   | 1 M KOH              | 10 mA cm <sup>-2</sup>                         | 1.618 V        | 10 h at 10 mA cm <sup>-2</sup>  | 41        |
| <b>NiS<sub>2</sub>/FeS<sub>2</sub>/NC</b>                           | 1 M KOH              | 10 mA cm <sup>-2</sup>                         | 1.58 V         | 40 h at 10 mA cm <sup>-2</sup>  | 42        |
| <b>Ni<sub>3</sub>S<sub>2</sub>/FeNi<sub>2</sub>S<sub>4</sub></b>    | 1 M KOH              | 10 mA cm <sup>-2</sup>                         | 1.55 V         | 50 h at 10 mA cm <sup>-2</sup>  | 43        |
| <b>NiFeCoS<sub>x</sub>@FeNi<sub>3</sub></b>                         | 1 M KOH              | 10 mA cm <sup>-2</sup>                         | 1.54 V         | 80 h at 10 mA cm <sup>-2</sup>  | 24        |
| <b>Ni<sub>3</sub>S<sub>4</sub>/NiS<sub>2</sub>/FeS<sub>2</sub></b>  | 1 M KOH              | 10 mA cm <sup>-2</sup>                         | 1.68 V         | 20 h at 10 mA cm <sup>-2</sup>  | 13        |
| <b>Se-(NiCo)S/OH</b>                                                | 1 M KOH              | 10 mA cm <sup>-2</sup>                         | 1.6 V          | 70 h at 10 mA cm <sup>-2</sup>  | 44        |
| <b>NiCo<sub>2</sub>S<sub>4</sub> NW/NF</b>                          | 1 M KOH              | 10 mA cm <sup>-2</sup>                         | 1.63 V         | 50 h at 10 mA cm <sup>-2</sup>  | 17        |
| <b>Au/Ni<sub>3</sub>S<sub>2</sub>NF</b>                             | 1 M KOH              | 10 mA cm <sup>-2</sup>                         | 1.52 V         | 60 h at 10 mA cm <sup>-2</sup>  | 18        |
| <b>Fe-Ni<sub>3</sub>S<sub>2</sub>/NF</b>                            | 1 M KOH              | 10 mA cm <sup>-2</sup>                         | 1.54 V         | 10 h at 10 mA cm <sup>-2</sup>  | 45        |
| <b>Ni<sub>3</sub>S<sub>2</sub>/MnO<sub>2</sub></b>                  | 1 M KOH              | 10 mA cm <sup>-2</sup>                         | 1.52 V         | 48 h at 10 mA cm <sup>-2</sup>  | 46        |
| <b>O-CoMoS</b>                                                      | 1 M KOH              | 10 mA cm <sup>-2</sup>                         | 1.6 V          | 10 h at 10 mA cm <sup>-2</sup>  | 47        |

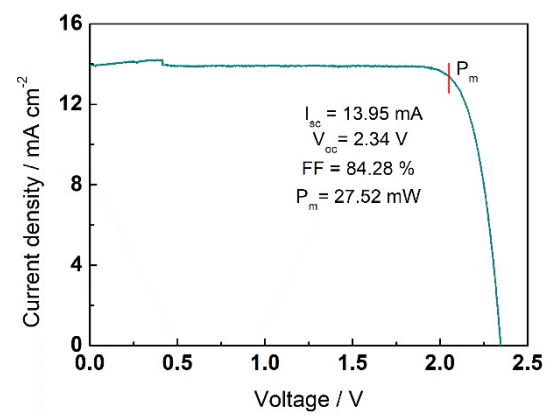

Figure S24. J–V curves of the GaInP/GaAs/Ge solar cell.

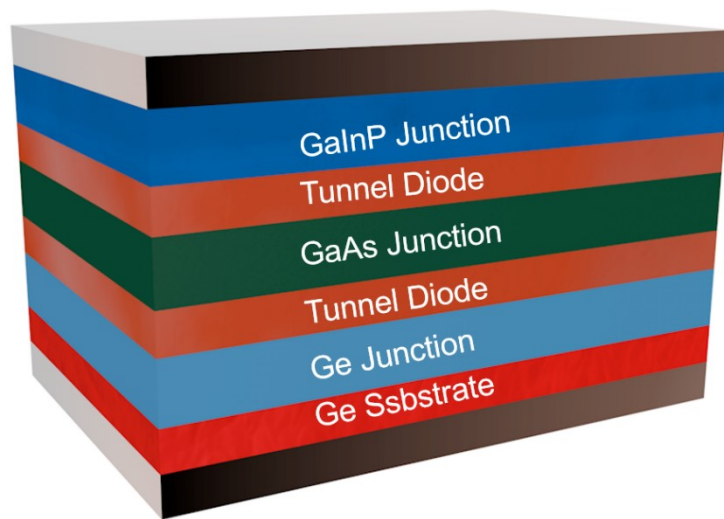

Figure S25. Structure of the GaInP/GaAs/Ge solar cell.

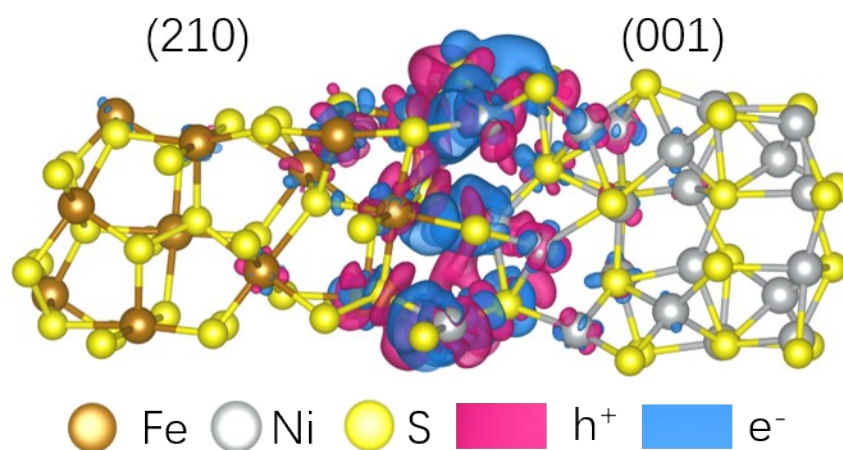

Figure S26. Optimized atomic structure of  $\text{FeS}_2/\text{Ni}_3\text{S}_2$  heterostructure and differential charge density between  $\text{FeS}_2$  and  $\text{Ni}_3\text{S}_2$ .

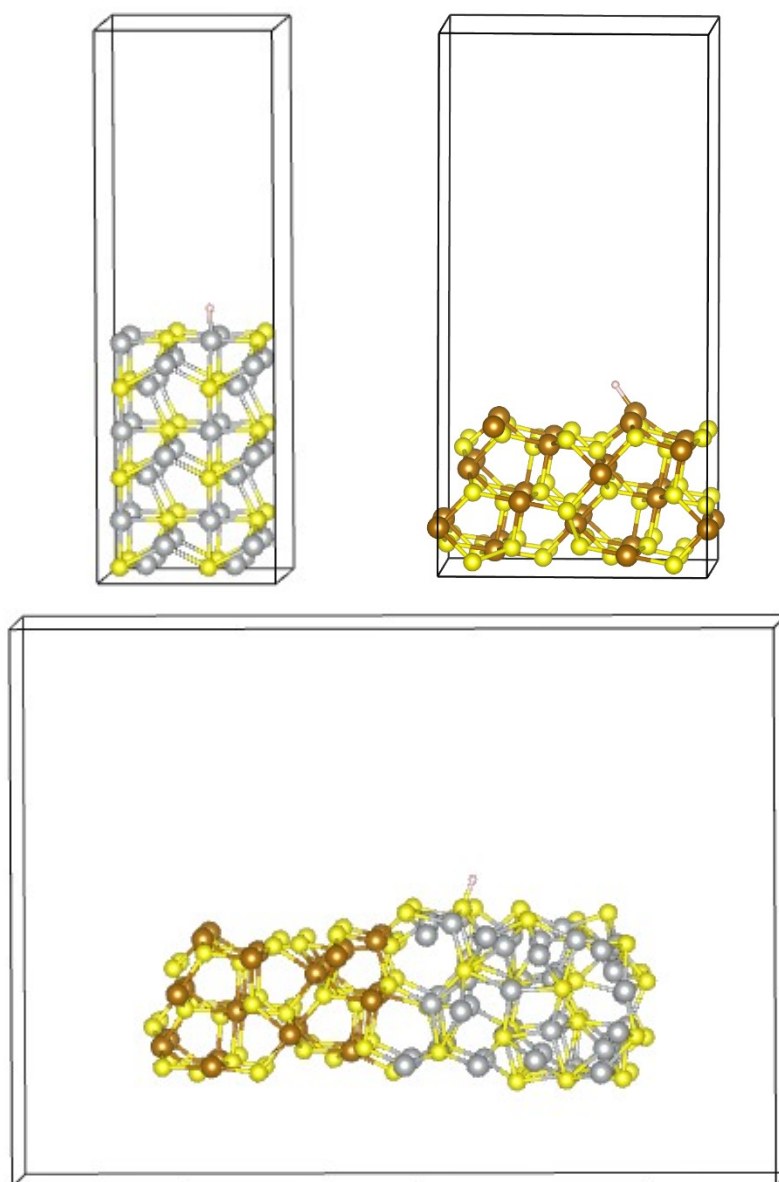

Figure S27. The configurations of hydrogen adsorption on  $\text{Ni}_3\text{S}_2$  (001) surface,  $\text{FeS}_2$  (210) surface, and  $\text{FeS}_2/\text{Ni}_3\text{S}_2$  heterostructure.

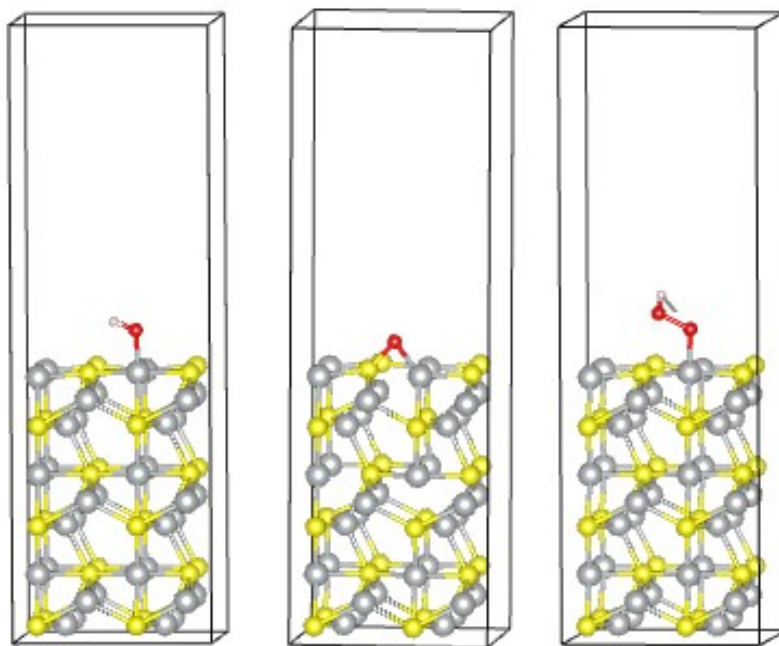

Figure S28. The configurations of the intermediates (\*OH, \*O, and \*OOH) on the Ni<sub>3</sub>S<sub>2</sub> (001) surface.

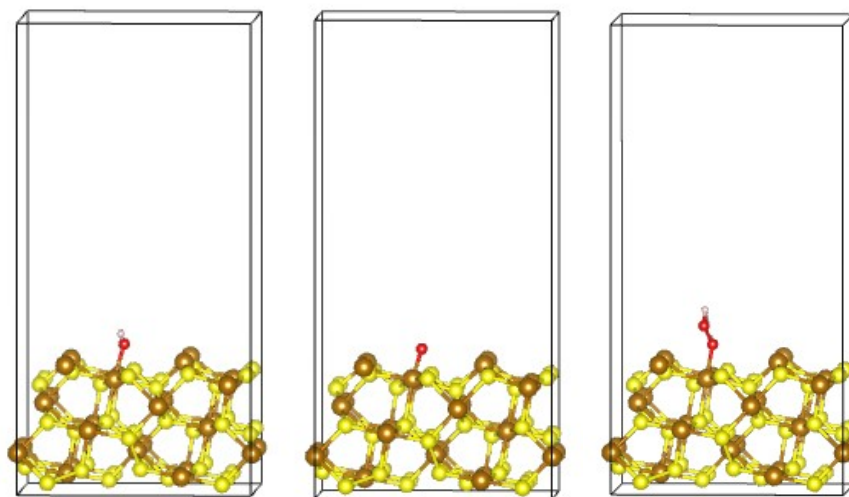

Figure S29. The configurations of the intermediates (\*OH, \*O, and \*OOH) on the FeS<sub>2</sub> (210) surface.

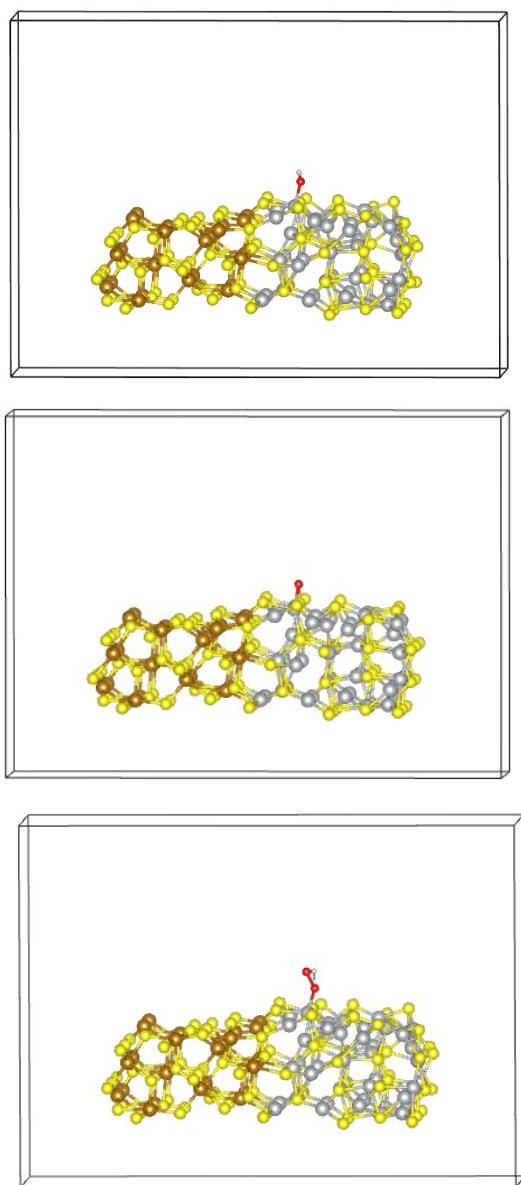

Figure S30. The configurations of the intermediates (\*OH, \*O, and \*OOH) on the surfaces of FeS<sub>2</sub>/Ni<sub>3</sub>S<sub>2</sub> heterostructure.

Video S1. The movie shows the release of hydrogen and oxygen on the electrolyze device driven by an AA battery of 1.5 V.

Video S2. The movie shows the release of hydrogen and oxygen on the electrolyze device driven by two AA batteries in a series of 1.5 V.

Video S3. The movie shows hydrogen and oxygen release under a constant current density of  $1 \text{ A cm}^{-2}$ .

Video S4. The movie shows when the novel solar-driven water-splitting monolithic device was immersed in the electrolyte and illuminated will produce both hydrogen and oxygen.

## References

1. J. Yang, H. Xuan, J. Yang, L. Meng, J. Wang, X. Liang, Y. Li and P. Han, *Appl. Surf. Sci.*, 2022, **578**, 152016.
2. G. Kresse and D. Joubert, *Phys. Rev. B*, 1999, **59**, 1758-1775.
3. G. Kresse; and J. Furthmuller., *Phys. Rev. B*, 1996, **54**, 11169-11186.
4. L. Wu, J. Li, C. Shi, Y. Li, H. Mi, L. Deng, Q. Zhang, C. He and X. Ren, *J. Mater. Chem. A*, 2022, **10**, 16627-16638.
5. H. Li, S. Yang, W. Wei, M. Zhang, Z. Jiang, Z. Yan and J. Xie, *J. Colloid Interface Sci.*, 2022, **608**, 536-548.
6. Z. Lei, W. Cai, Y. Rao, K. Wang, Y. Jiang, Y. Liu, X. Jin, J. Li, Z. Lv, S. Jiao, W. Zhang, P. Yan, S. Zhang and R. Cao, *Nat. Commun.*, 2022, **13**, 24.
7. J.-J. Lv, J. Zhao, H. Fang, L.-P. Jiang, L.-L. Li, J. Ma and J.-J. Zhu, *Small*, 2017, **13**, 1700264.
8. H. Zhang, H. Jiang, Y. Hu, P. Saha and C. Li, *Mater. Chem. Front.*, 2018, **2**, 1462-1466.
9. M. Zhou, Q. Weng, X. Zhang, X. Wang, Y. Xue, X. Zeng, Y. Bando and D. Golberg, *J. Mater. Chem. A*, 2017, **5**, 4335-4342.
10. W. Zhu, Z. Yue, W. Zhang, N. Hu, Z. Luo, M. Ren, Z. Xu, Z. Wei, Y. Suo and J. Wang, *J. Mater. Chem. A*, 2018, **6**, 4346-4353.
11. R. Zhang, L. Cheng, Z. Wang, F. Kong, Y. Tsegazab, W. Lv and W. Wang, *Appl. Surf. Sci.*, 2020, **526**, 146753.
12. Y. Yang, H. Meng, C. Kong, S. Yan, W. Ma, H. Zhu, F. Ma, C. Wang and Z. Hu, *J. Colloid Interface Sci.*, 2021, **599**, 300-312.
13. W. Wang, W. Wang, Y. Xu, X. Ren, X. Liu and Z. Li, *Appl. Surf. Sci.*, 2021, **560**, 149985.
14. C. Z. Yuan, Z. T. Sun, Y. F. Jiang, Z. K. Yang, N. Jiang, Z. W. Zhao, U. Y. Qazi, W. H. Zhang and A. W. Xu, *Small*, 2017, **13**, 1604161.
15. Q. Liu, L. Xie, Z. Liu, G. Du, A. M. Asiri and X. Sun, *Chem. Commun.*, 2017, **53**, 12446-12449.
16. Y. Liu, Q. Li, R. Si, G. D. Li, W. Li, D. P. Liu, D. Wang, L. Sun, Y. Zhang and X. Zou, *Adv. Mater.*, 2017, **29**, 1606200.
17. A. Sivanantham, P. Ganesan and S. Shanmugam, *Adv. Funct. Mater.*, 2016, **26**, 4661-4672.
18. H. Liu, J. Cheng, W. He, Y. Li, J. Mao, X. Zheng, C. Chen, C. Cui and Q. Hao, *Appl. Catal., B*, 2022, **304**, 120935.
19. W. Zhu, X. Yue, W. Zhang, S. Yu, Y. Zhang, J. Wang and J. Wang, *Chem. Commun.*, 2016, **52**, 1486-1489.
20. P. Chen, T. Zhou, M. Zhang, Y. Tong, C. Zhong, N. Zhang, L. Zhang, C. Wu and Y. Xie, *Adv. Mater.*, 2017, **29**, 1701584.
21. X. Luo, P. Ji, P. Wang, X. Tan, L. Chen and S. Mu, *Adv. Sci.*, 2022, **9**, e2104846.
22. P. Wang, R. Qin, P. Ji, Z. Pu, J. Zhu, C. Lin, Y. Zhao, H. Tang, W. Li and S. Mu, *Small*, 2020, **16**, e2001642.
23. B. Fei, Z. Chen, J. Liu, H. Xu, X. Yan, H. Qing, M. Chen and R. Wu, *Adv. Energy Mater.*, 2020, **10**, 2001963.
24. J. Shen, Q. Li, W. Zhang, Z. Cai, L. Cui, X. Liu and J. Liu, *J. Mater. Chem. A*, 2022, **10**, 5442-5451.
25. L. Li, C. Sun, B. Shang, Q. Li, J. Lei, N. Li and F. Pan, *J. Mater. Chem. A*, 2019, **7**, 18003-18011.
26. H. Liu, Q. He, H. Jiang, Y. Lin, Y. Zhang, M. Habib, S. Chen and L. Song, *ACS Nano*, 2017, **11**, 11574-11583.
27. Y. Guo, J. Tang, H. Qian, Z. Wang and Y. Yamauchi, *Chem. Mater.*, 2017, **29**, 5566-5573.
28. J. Yu, G. Cheng and W. Luo, *J. Mater. Chem. A*, 2017, **5**, 15838-15844.
29. J.-X. Feng, J.-Q. Wu, Y.-X. Tong and G.-R. Li, *J. Am. Chem. Soc.*, 2018, **140**, 610-617.
30. Y. Qu, M. Yang, J. Chai, Z. Tang, M. Shao, C. T. Kwok, M. Yang, Z. Wang, D. Chua, S. Wang, Z. Lu and H. Pan, *ACS Appl. Mater. Interfaces*, 2017, **9**, 5959-5967.
31. H. Liu, X. Ma, Y. Rao, Y. Liu, J. Liu, L. Wang and M. Wu, *ACS Appl. Mater. Interfaces*, 2018, **10**, 10890-10897.
32. T. Kou, T. Smart, B. Yao, I. Chen, D. Thota, Y. Ping and Y. Li, *Adv. Energy Mater.*, 2018, **8**, 1703538.
33. N. Jiang, Q. Tang, M. Sheng, B. You, D.-e. Jiang and Y. Sun, *Catal. Sci. Technol.*, 2016, **6**, 1077-1084.
34. Y. Zhang, J. Fu, H. Zhao, R. Jiang, F. Tian and R. Zhang, *Appl. Catal., B*, 2019, **257**, 117899.
35. W. Dai, K. Ren, Y.-a. Zhu, Y. Pan, J. Yu and T. Lu, *J. Alloys Compd.*, 2020, **844**, 156252.
36. X. Ji, C. Cheng, Z. Zang, L. Li, X. Li, Y. Cheng, X. Yang, X. Yu, Z. Lu, X. Zhang and H. Liu, *J. Mater. Chem. A*, 2020, **8**, 21199-21207.
37. S. Huang, Y. Meng, Y. Cao, F. Yao, Z. He, X. Wang, H. Pan and M. Wu, *Appl. Catal., B*, 2020, **274**, 119120.
38. Y. Zhang, H. Guo, X. Li, J. Du, W. Ren and R. Song, *Chem. Eng. J.*, 2021, **404**, 126483.
39. Z. Tan, L. Sharma, R. Kakkar, T. Meng, Y. Jiang and M. Cao, *Inorg. Chem.*, 2019, **58**, 7615-7627.
40. Y. Wu, F. Li, W. Chen, Q. Xiang, Y. Ma, H. Zhu, P. Tao, C. Song, W. Shang, T. Deng and J. Wu, *Adv. Mater.*, 2018, **30**, e1803151.
41. R. Zhang, Z. Zhu, J. Lin, K. Zhang, N. Li and C. Zhao, *Electrochim. Acta*, 2020, **332**, 135534.
42. S. Wang, P. Ning, S. Huang, W. Wang, S. Fei, Q. He, J. Zai, Y. Jiang, Z. Hu, X. Qian and Z. Chen, *J. Power Sources*, 2019, **436**, 226857.
43. Y. Wu, Y. Li, M. Yuan, H. Hao, X. San, Z. Lv, L. Xu and B. Wei, *Chem. Eng. J.*, 2022, **427**, 131944.
44. C. Hu, L. Zhang, Z. J. Zhao, A. Li, X. Chang and J. Gong, *Adv. Mater.*, 2018, **30**, e1705538.
45. G. Zhang, Y.-S. Feng, W.-T. Lu, D. He, C.-Y. Wang, Y.-K. Li, X.-Y. Wang and F.-F. Cao, *ACS Catal.*, 2018, **8**, 5431-5441.

46. Y. Xiong, L. Xu, C. Jin and Q. Sun, *Appl. Catal., B*, 2019, **254**, 329-338.
47. J. Hou, B. Zhang, Z. Li, S. Cao, Y. Sun, Y. Wu, Z. Gao and L. Sun, *ACS Catal.*, 2018, **8**, 4612-4621.
